# Supplementary material
Source: Elsevier journal article supplement (https://www.sciencedirect.com/science/article/pii/S0300893222000938)
Supplement: mmc1 [file mmc1.pdf]

**ANEXO. MATERIAL ADICIONAL**

Gema Varo Sánchez, José Vicente Garcia Lario, Joaquín Bobillo Lobato, Carlos Macias Blanco, Andrés Cobos, Esther Roldán Fontana, Gloria Salaya Algarín, Irene Baena Ferrer, M. Montaña Jiménez Álvaro, M. Cinta Montilla, Lourdes de la Peña Carreter, María Victoria Romero Sotomayor, María Luisa Hortas, Félix Gascón Luna, M. Mar del Águila García, Jorge Montenegro Martínez, Isabel Rodríguez Sánchez, Antonio Fernández Suarez, M. Ángeles Arroyo Jiménez, Pura García Yun, Isabel Tovar García, Jessica Roa Garrido, María Rosa Fernández Olmo, Mar Martínez Quesada, Rafael Hidalgo Urbano, Inmaculada Pérez de la Algaba Fuentes, Ignacio Vázquez Rico, Elena Bonet Struch, David León Jiménez, Miguel Ángel Rico Corral, Cristóbal Morales Portillo, Ana Rodríguez Rodríguez, Isabel Rodríguez Sánchez, Cristina Castro Jarillo y María Mayor Reyes.
